# Supplementary material for: Mutations in sphingolipid metabolism genes are associated with ADHD
Source: PubMed Central journal article supplement (PMC7359313; doi:10.1038/s41398-020-00881-8), 2020-07-13

# **Supplementary Material**

## **Mutations in Sphingolipid Metabolism Genes Are Associated with ADHD**

Marcela Henriquez-Henriquez, Maria T. Acosta, Ariel F. Martinez, Jorge I. Vélez, Francisco Lopera,

David Pineda, Juan D. Palacio, Teresa Quiroga, Tilla S. Worgall, Richard J. Deckelbaum,

Claudio Mastronardi, Brooke S. G. Molina and the MTA Cooperative Group,

Mauricio Arcos-Burgos, and Maximilian Muenke

**Table S1.** Result of SNP-based association analysis for targeted genes in the PGC data set.

| Gene           | Number of SNPs<br>in PGC data set | -log <sub>10</sub> ( <i>P</i> -value) |                     | SNP-based<br>combined <i>P</i> -value <sup>a</sup> |
|----------------|-----------------------------------|---------------------------------------|---------------------|----------------------------------------------------|
|                |                                   | Min (SNP)                             | Max (SNP)           |                                                    |
| <i>GALC</i>    | 676                               | 0.0013 (rs75360027)                   | 2.6660 (rs8008772)  | 1.0000                                             |
| <i>CERS6</i>   | 822                               | 0.0011 (rs10490712)                   | 2.3614 (rs10490712) | <0.0001                                            |
| <i>SMPD1</i>   | 7                                 | 0.4306 (rs1050228)                    | 0.8539 (rs1050239)  | 0.0130                                             |
| <i>SMPDL3B</i> | 74                                | 0.0168 (rs57607983)                   | 1.6538 (rs11577165) | 0.0034                                             |
| <i>CERS2</i>   | 29                                | 0.1058 (rs2280627)                    | 0.9488 (rs525676)   | 0.9502                                             |
| <i>FADS3</i>   | 37                                | 0.0134 (rs76656467)                   | 1.0835 (rs75306442) | 0.9998                                             |
| <i>ELOVL5</i>  | 255                               | 0.0003 (rs70980834)                   | 0.9270 (rs209512)   | 0.9376                                             |
| <i>CERK</i>    | 112                               | 0.0057 (rs135692)                     | 2.6558 (rs74486714) | 0.9786                                             |
| Total          | 2012                              |                                       |                     |                                                    |

<sup>a</sup>Estimated using Stouffer's method (Stouffer et al, 1949).

**Table S2.** Results of the gene-based association test for target genes in the PGC data set.

| Gene           | VEGAS-2                    |                              | KGG 4.0 <i>P</i> -value |          |
|----------------|----------------------------|------------------------------|-------------------------|----------|
|                | Gene-based <i>P</i> -value | Top SNP ( <i>P</i> -value)   | GATES                   | ECS      |
| <i>GALC</i>    | 0.973                      | rs117778022 (0.075)          | 0.9968                  | 0.89619  |
| <i>CERS6</i>   | 0.099                      | rs183574665 ( <b>0.005</b> ) | <i>a</i>                | <i>a</i> |
| <i>SMPD1</i>   | 0.182                      | rs1050239 (0.140)            | <i>a</i>                | <i>a</i> |
| <i>SMPDL3B</i> | 0.206                      | rs11577165 ( <b>0.022</b> )  | <i>a</i>                | <i>a</i> |
| <i>CERS2</i>   | 0.956                      | rs11579289 (0.522)           | <i>a</i>                | <i>a</i> |
| <i>FADS3</i>   | 0.929                      | rs75306442 (0.083)           | <i>a</i>                | <i>a</i> |
| <i>ELOVL5</i>  | 0.606                      | rs209512 (0.118)             | <i>a</i>                | <i>a</i> |
| <i>CERK</i>    | 0.746                      | rs9616098 ( <b>0.010</b> )   | <i>a</i>                | <i>a</i> |

<sup>a</sup>Not reported. VEGAS-2: Versatile gene-based association study version 2; KGG: Knowledge-based mining system for Genome-wide Genetic studies; GATES: Gene-based association test using extended Simes procedure; ECS: Effective chi-squared test.

**Table S3.** Pairwise linkage disequilibrium coefficients from the 1000 Genomes dataset.

| Chr | Gene  | AFR <sup>a</sup>     |              |              | AMR <sup>b</sup>     |             |              | EUR <sup>c</sup>     |              |              |              |
|-----|-------|----------------------|--------------|--------------|----------------------|-------------|--------------|----------------------|--------------|--------------|--------------|
|     |       | D' (r <sup>2</sup> ) |              |              | D' (r <sup>2</sup> ) |             |              | D' (r <sup>2</sup> ) |              |              |              |
|     |       | rs74073730           | rs398607     | rs1805078    | rs7407730            | rs398607    | rs1805078    | rs74073730           | rs398607     | rs1805078    |              |
| 14  | GALC  | rs74073730           | -            | 1 (0.1329)   | 1 (0.0001)           | -           | 1 (0.0009)   | 1 (0.0001)           | -            | NA           | NA           |
|     |       | rs398607             | 1 (0.0706)   | -            | 1 (0.0008)           | 1 (0.0009)  | -            | 0.93 (0.051)         | NA           | -            | 0.97 (0.065) |
|     |       | rs1805078            | 1 (0.0001)   | 1 (0.0008)   | -                    | 1 (0.0001)  | 0.93 (0.051) | -                    | NA           | 0.97 (0.065) | -            |
| 11  | SMPDI | rs7951904            | -            | 1 (0.2302)   | -                    | 1 (0.0525)  | -            | -                    | -            | NA           | NA           |
|     |       | rs35785620           | 1 (0.2302)   | -            | -                    | 1 (0.0525)  | -            | -                    | NA           | -            | -            |
|     |       | rs13393173           | -            | 0.52 (0.027) | -                    | -           | 0.2 (0.025)  | -                    | -            | 0.39 (0.093) | -            |
| 6   | CERS6 | rs13393173           | -            | 0.52 (0.027) | -                    | 0.2 (0.025) | -            | -                    | 0.39 (0.093) | -            | -            |
|     |       | rs4668077            | 0.52 (0.027) | -            | -                    | 0.2 (0.025) | -            | -                    | 0.39 (0.093) | -            | -            |
|     |       | rs13393173           | -            | 0.52 (0.027) | -                    | -           | 0.2 (0.025)  | -                    | -            | 0.39 (0.093) | -            |

<sup>a</sup>Minor allele frequency (MAF) in AFR (1000 genomes) rs74073730= 0.068; rs398607= 0.355; rs1805078= 0.002; rs7951904= 0.212; rs35785620= 0.058; rs13393173= 0.014; rs4668077= 0.27

<sup>b</sup>MAF in AMR (1000 genomes) rs74073730= 0.001; rs398607= 0.379; rs1805078=0.035; rs7951904= 0.099; rs35785620= 0.006; rs13393173= 0.148; rs4668077= 0.277

<sup>c</sup>MAF in EUR (1000 genomes) rs74073730= 0; rs398607= 0.488; rs1805078=0.062; rs7951904= 0.124; rs35785620= 0; rs13393173= 0.24; rs4668077= 0.16

AFR =African; AMR = Admixed American; EUR = European

**Figure S1.** GWAS meta-analysis  $P$ -values for the PGC data set SNPs harbored sphingolipid metabolism genes found to be associated with ADHD in our study. FBAT-based raw  $P$ -values for SNPs associated with ADHD in the MTA, Paisa and US samples are shown in color. For more details, see Tables 2 and 3 of the main manuscript.

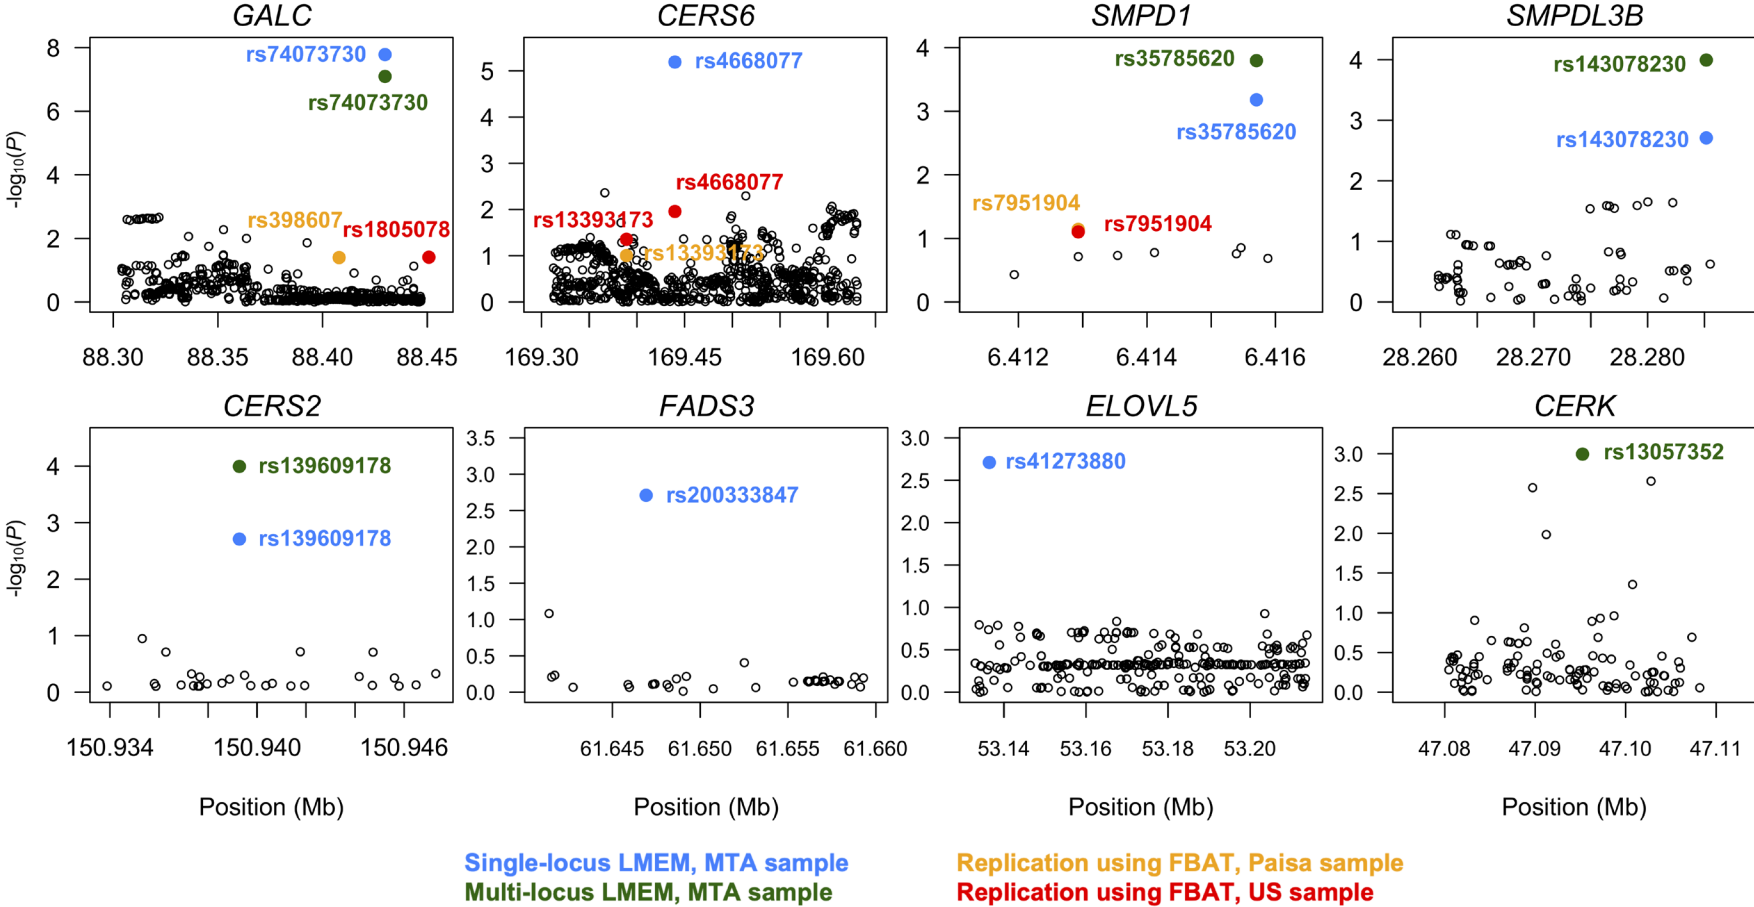

**Figure S2.** GALC mRNA expression in human post-mortem tissue is influenced by ADHD risk variant rs398607. Risk variant G is significantly associated with increased GALC expression in the cerebellum ( $P=2.9 \times 10^{-8}$ ) (<https://gtexportal.org/home/snp/rs398607>).

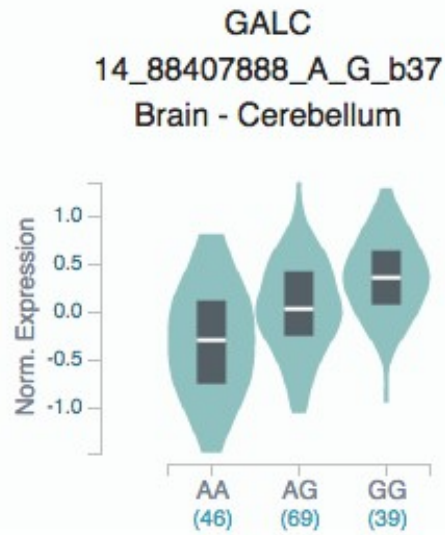

Supplement: 41398_2020_881_MOESM1_ESM.pdf [file 41398_2020_881_MOESM1_ESM.pdf]
